# Supplementary material
Source: ML conference proceedings conference paper supplement (https://www.ecva.net/papers/eccv_2022/papers_ECCV/html/136620018_ECCV_2022_paper.php)
Supplement: Supplementary file 1 [file 136620018-supp.pdf]

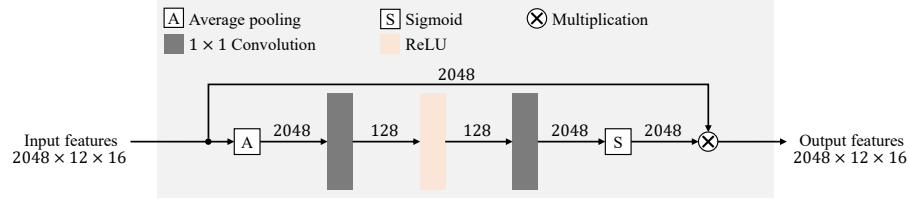

Fig. S2: Detailed structure of the channel attention layer. Each number denotes the number of channels of a feature tensor.

## S2. Encoder Backbones

We test the proposed algorithm using different encoder backbones on the NYUv2 dataset [45]. Table S1 compares the proposed algorithm with the conventional algorithms: Lee and Kim [28], and Bhat *et al.* [1]. It is observed that the proposed algorithm performs better than the conventional algorithms when using the same backbone network. Also, the proposed algorithm outperforms [28] meaningfully and comparable to [1] when using only 17K training images.

Table S1: Depth estimation results on NYUv2 using various encoder backbone.

| Method                 | Encoder backbone     | #   | RMSE         | REL          | log 10       | $\delta_1$   | $\delta_2$   | $\delta_3$   |
|------------------------|----------------------|-----|--------------|--------------|--------------|--------------|--------------|--------------|
| Lee and Kim [28]       | PNASNet-5 [36]       | 58K | 0.430        | 0.119        | 0.050        | 0.870        | 0.974        | 0.993        |
| Proposed               | PNASNet-5 [36]       | 17K | <b>0.403</b> | <b>0.109</b> | <b>0.048</b> | <b>0.882</b> | <b>0.983</b> | <b>0.997</b> |
| Bhat <i>et al.</i> [1] | EfficientNet-B5 [47] | 50K | 0.364        | 0.103        | 0.044        | 0.903        | 0.984        | <b>0.997</b> |
| Proposed               | EfficientNet-B5 [47] | 17K | 0.370        | 0.103        | 0.045        | 0.903        | <b>0.986</b> | <b>0.997</b> |
| Proposed               | EfficientNet-B5 [47] | 51K | <b>0.362</b> | <b>0.100</b> | <b>0.043</b> | <b>0.907</b> | <b>0.986</b> | <b>0.997</b> |

## S3. Loss Functions

The weights for  $\mathcal{L}_G$  and  $\mathcal{L}_N$  are set to 1, and those for  $\mathcal{L}_{M_x}$ ,  $\mathcal{L}_{M_y}$ ,  $\mathcal{L}_{N_x}$  and  $\mathcal{L}_{N_y}$  are set to 0.2, as in [33, 51]. Also, the weights for  $\mathcal{L}_{\mu_M}$ ,  $\mathcal{L}_M$ , and  $\mathcal{L}_{\log_M}$  are 1, 0.5, 0.5, respectively.

Note that we use  $\mathcal{L}_{\log_M}$  to alleviate the problem that  $\mathcal{L}_M$  is less effective for distant depths. Table S2 compares the performances with and without  $\mathcal{L}_{\log_M}$  for pixels whose ground-truth depths are farther or nearer than 5m. The pixels farther than 5m account for 5.17% of all pixels. We see that the performances improve in most metrics when  $\mathcal{L}_{\log_M}$  is applied in addition to  $\mathcal{L}_M$ .

Table S2: Efficacy of  $\mathcal{L}_{\log M}$  according to the ground-truth depth range.

| Distance  | Setting                                | RMSE         | REL          | log 10       | $\delta_1$   | $\delta_2$   | $\delta_3$   |
|-----------|----------------------------------------|--------------|--------------|--------------|--------------|--------------|--------------|
| > 5m      | $\mathcal{L}_M$                        | 0.755        | 0.096        | 0.046        | 0.879        | 0.978        | <b>0.999</b> |
|           | $\mathcal{L}_{\log M}$                 | 0.749        | <b>0.095</b> | <b>0.045</b> | 0.883        | <b>0.979</b> | <b>0.999</b> |
|           | $\mathcal{L}_M + \mathcal{L}_{\log M}$ | <b>0.743</b> | <b>0.095</b> | <b>0.045</b> | <b>0.888</b> | <b>0.979</b> | 0.998        |
| $\leq 5m$ | $\mathcal{L}_M$                        | 0.301        | <b>0.098</b> | 0.043        | 0.911        | 0.988        | <b>0.998</b> |
|           | $\mathcal{L}_{\log M}$                 | 0.298        | 0.099        | <b>0.042</b> | <b>0.914</b> | 0.988        | <b>0.998</b> |
|           | $\mathcal{L}_M + \mathcal{L}_{\log M}$ | <b>0.296</b> | <b>0.098</b> | <b>0.042</b> | <b>0.914</b> | <b>0.989</b> | <b>0.998</b> |

#### S4. Efficacy of $\mu_M$

To evaluate the efficacy of  $\mu_M$ , we define the depth mean error as

$$|\mu(\hat{M}) - \mu(M)| \quad (\text{S1})$$

where  $M$  and  $\hat{M}$  denote the ground-truth and predicted depth maps, respectively. Also,  $\mu(\cdot)$  denote the mean of valid pixel depths in a depth map. We use  $\mu(\cdot)$  rather than  $\mu_M$  since the ground truth depth map in NYUv2 is not dense.

Instead of MDR, we train an alternative regressor using the output of the shared encoder after average pooling followed by fully connected layers to predict  $\mu_M$ . By comparing the first and the second rows in Table S3, we see that without MDR, the explicit regression of  $\mu_M$  rather degrades the performances. MDR is also used to regress the scale feature  $\sigma_M$  explicitly as well, but scaling by  $\sigma_M$  is less reliable than shifting by  $\mu_M$ . Hence, it degrades the performances in the last row in Table S3.

Table S3: Depth mean errors on the NYUv2 dataset with and without MDR and regression of  $\mu_M$ .

| MDR | $\mu_M$    | RMSE         | REL          | log 10       | $\delta_1$   | $\delta_2$   | $\delta_3$   | Mean error   |
|-----|------------|--------------|--------------|--------------|--------------|--------------|--------------|--------------|
| ✓   | -          | 0.381        | 0.108        | 0.046        | 0.894        | 0.984        | <b>0.997</b> | 0.168        |
| -   | ✓          | 0.393        | 0.114        | 0.048        | 0.884        | 0.982        | 0.996        | 0.173        |
| ✓   | ✓          | <b>0.370</b> | <b>0.103</b> | <b>0.045</b> | <b>0.903</b> | <b>0.986</b> | <b>0.997</b> | <b>0.155</b> |
| MDR | $\sigma_M$ | RMSE         | REL          | log 10       | $\delta_1$   | $\delta_2$   | $\delta_3$   | Mean error   |
| ✓   | ✓          | 0.385        | 0.112        | 0.047        | 0.889        | 0.982        | <b>0.997</b> | 0.169        |

Next, we define the depth distribution error as

$$|\sigma(\hat{M}) - \sigma(M)| \quad (\text{S2})$$

where  $\sigma(\cdot)$  denote the standard deviation of valid pixel depths in a depth map. Table S4 compares the depth distribution errors of MDR\* and MDR, which denote the proposed algorithm with  $\mu_M$  deactivated and activated, respectively, as in Table 5 in the main paper. Again, MDR performs better than MDR\*.

Table S4: Depth distribution errors on the NYUv2 dataset.

| MDR*  | MDR          |
|-------|--------------|
| 0.144 | <b>0.134</b> |

Fig. S3 shows qualitative results, together with the standard deviations  $\sigma$  of the corresponding depth maps. We see that, by predicting  $\mu_M$  through the MDR block, we can estimate the overall depth scales more reliably.

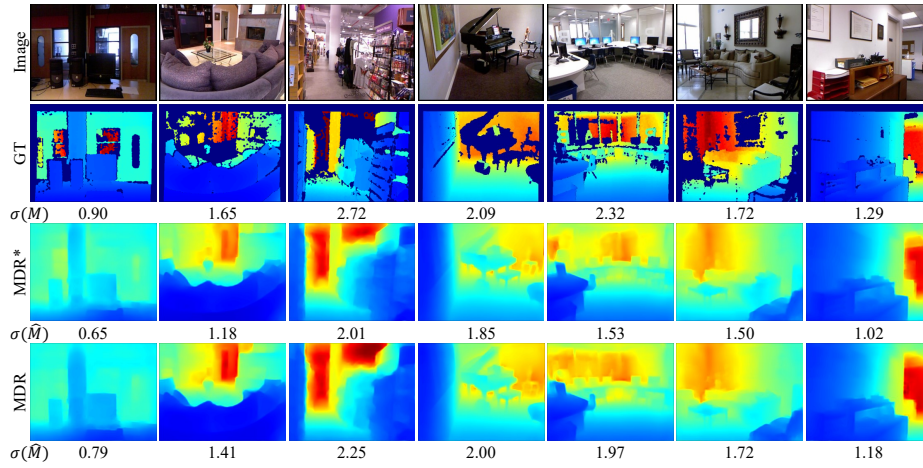

Fig. S3: Qualitative comparison of metric depth maps, estimated by MDR\* and MDR, respectively.

## S5. Efficacy of G-Net

To demonstrate the efficacy of G-Net, we train the proposed algorithm using N-Net and M-Net only, excluding G-Net. This combination is denoted by M+N, while the default combination by M+N+G. Note that M+N and M+N+G in Table S5 are identical to the second and third rows of Table 3 in the main paper, respectively. In the green boxes in Fig. S4, M+N+G provides sharper edges and more consistent depths on planar regions than M+N does, indicating G-Net helps to improve the performances. Fig. S5 compares metric depth maps. Note that M+N+G reduces estimation errors.

Table S5: Depth estimation results on NYUv2 according to the use of G-Net.

| Setting | RMSE         | REL          | log 10       | $\delta_1$   | $\delta_2$   | $\delta_3$   | Kendall's $\tau$ | WHDR(%)      |
|---------|--------------|--------------|--------------|--------------|--------------|--------------|------------------|--------------|
| M+N     | 0.389        | 0.111        | <b>0.047</b> | <b>0.888</b> | <b>0.982</b> | 0.996        | 0.814            | 14.19        |
| M+N+G   | <b>0.387</b> | <b>0.109</b> | <b>0.047</b> | <b>0.888</b> | <b>0.982</b> | <b>0.997</b> | <b>0.817</b>     | <b>14.01</b> |

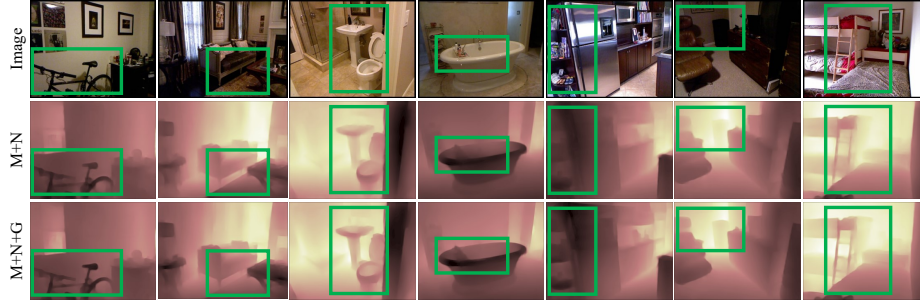

Fig. S4: Normalized depth maps of the two combinations M+N and M+N+G. The differences can be more easily observed within the green boxes.

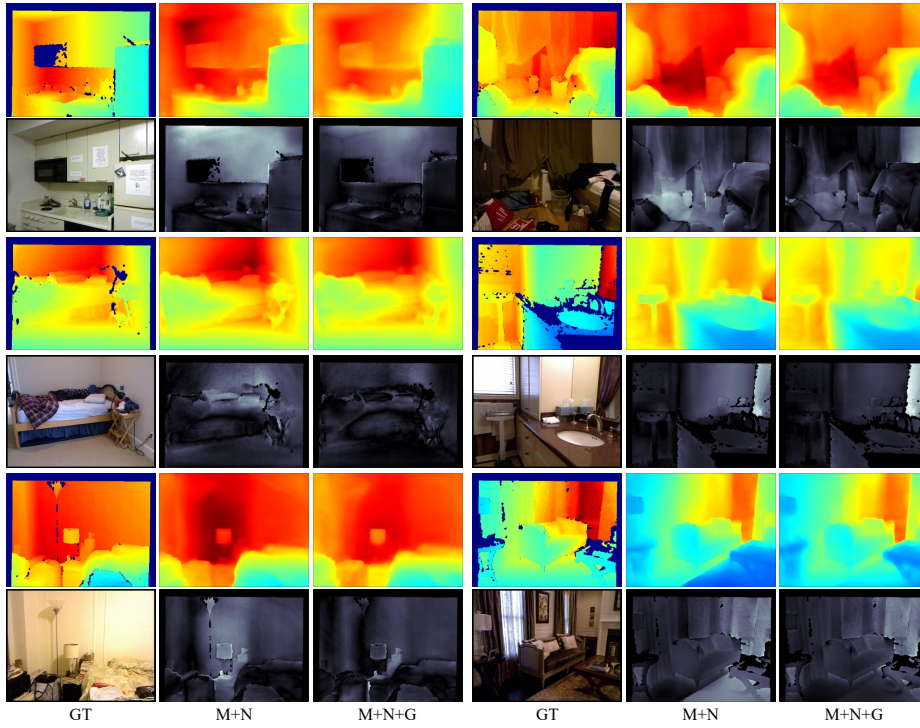

Fig. S5: Metric depth maps of M+N and M+N+G. The error maps are also provided, in which brighter pixels correspond to larger errors.

## S6. More Qualitative Results

Fig. S6 and Fig. S7 compare the proposed algorithm with the conventional algorithms [1, 42] on the NYUv2 dataset.

Fig. S8 and Fig. S9 compare the proposed algorithm with the baseline network on the NYUv2 dataset, when the 795 NYU training images and the DIML-Indoor [23] dataset are used for the training, respectively.

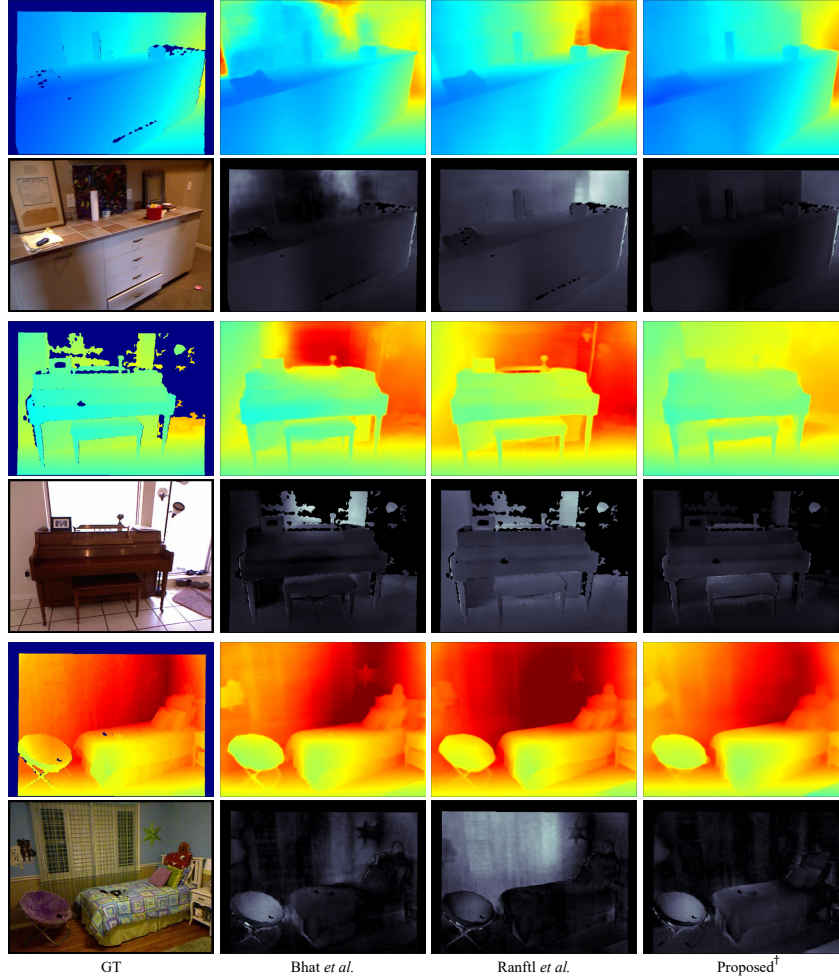

Fig. S6: Qualitative comparison of the proposed algorithm with Bhat *et al.* [1] and Ranftl *et al.* [42] on the NYUv2 dataset. The error maps are also provided, in which brighter pixels correspond to larger errors.



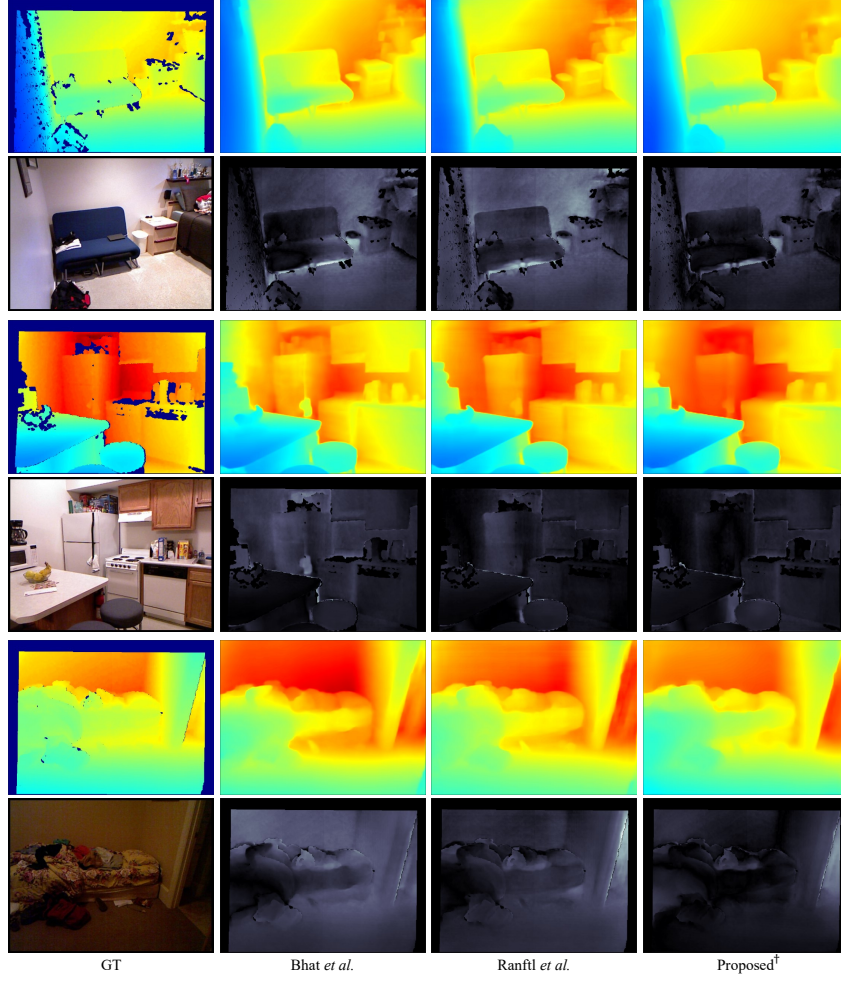

Fig.S7: Qualitative comparison of the proposed algorithm with Bhat *et al.* [1] and Ranftl *et al.* [42] on the NYUv2 dataset. The error maps are also provided, in which brighter pixels correspond to larger errors.

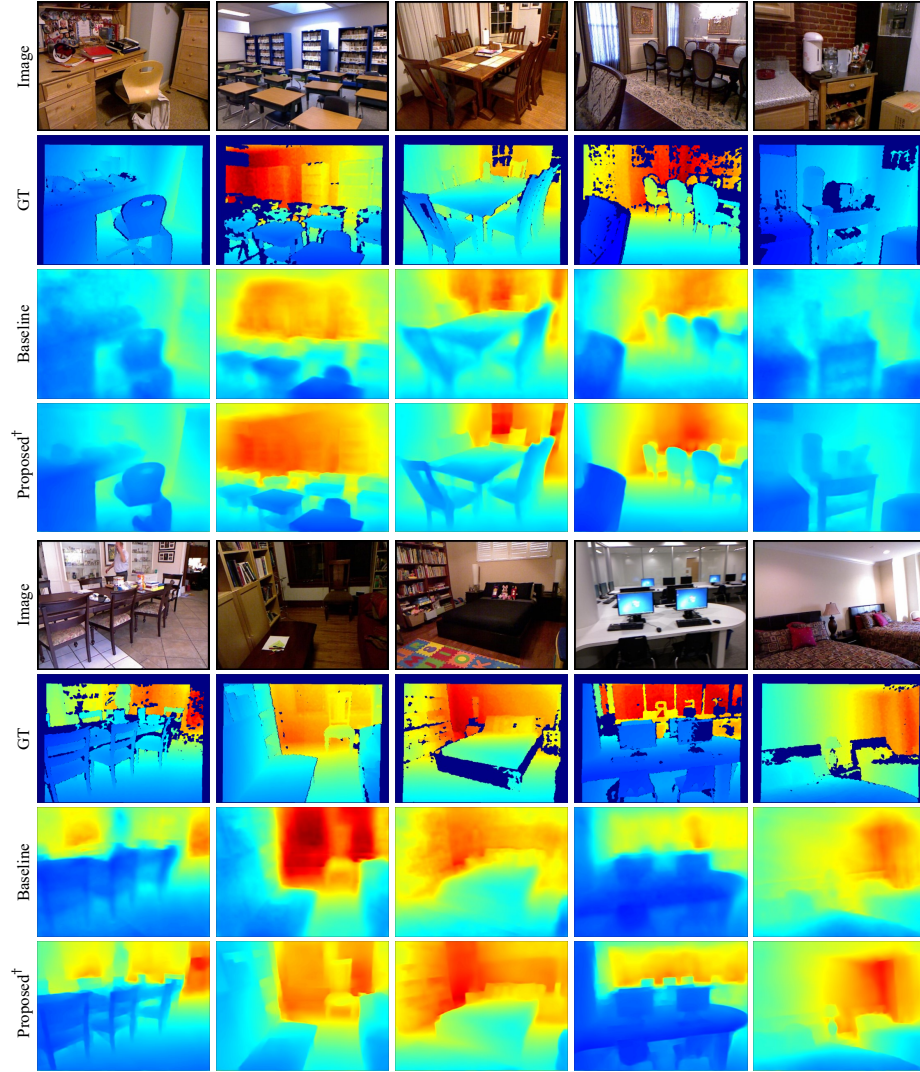

Fig. S8: Qualitative comparison of the proposed algorithm with the baseline using the 795 NYUv2 training images.



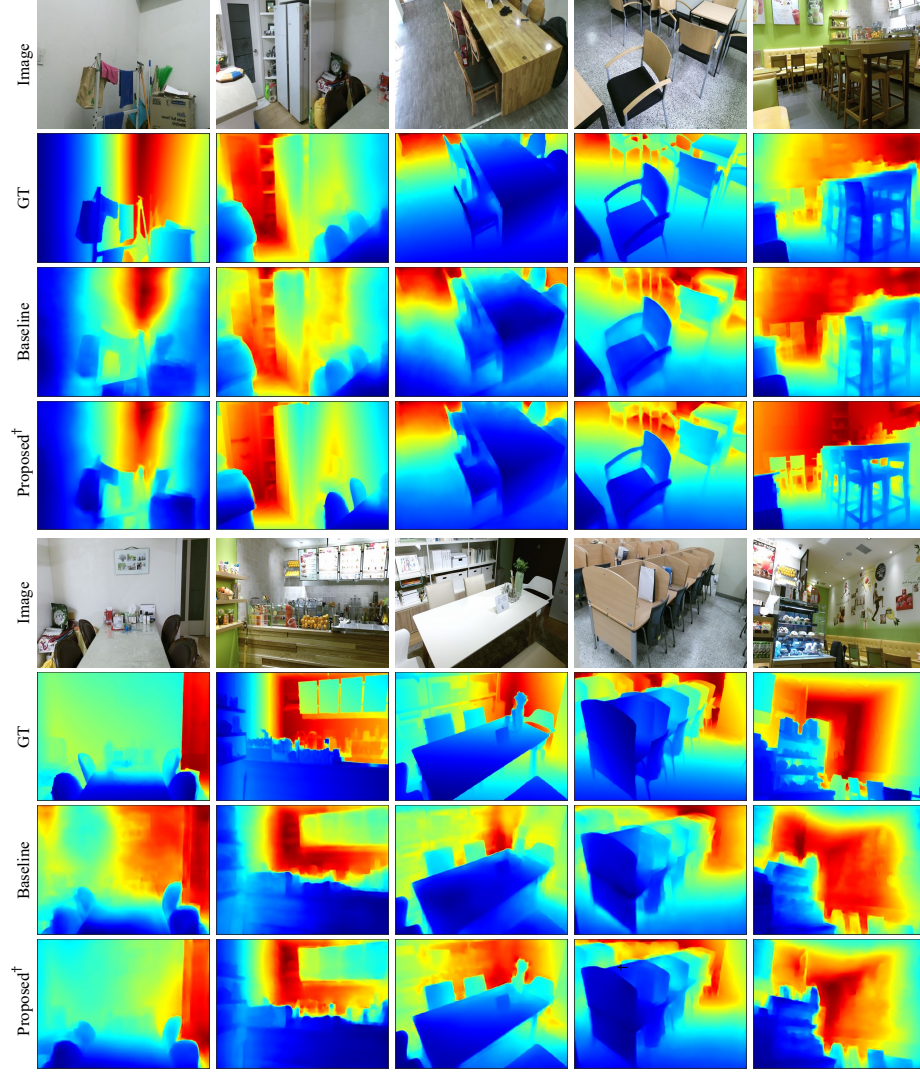

Fig. S9: Qualitative comparison of the proposed algorithm with the baseline using the DIML-Indoor dataset.
